# Supplementary material for: Enhancing perovskite solar cell efficiency and stability through the incorporation of BDAI2 and DMPDAI2
Source: Royal Society of Chemistry journal article supplement (doi:10.1039/d3ya00496a), 2024-01-01
Supplement: d3ya00496a1.pdf [file d3ya00496a1.pdf]

## Supporting Information

# Enhancing Perovskite Solar Cell Efficiency and Stability through the Incorporation of $\text{BDAl}_2$ and $\text{DMPDAI}_2$

Han Wen Chang<sup>1,#</sup>, Chien Cheng Li<sup>1,#</sup>, Tzu Yu Haung<sup>1</sup>, Hsin Chieh Li<sup>1</sup>, Chih Shan Tan<sup>1\*</sup>

<sup>1</sup>Institute of Electronics, National Yang Ming Chiao Tung University, Hsinchu 30010, Taiwan

### Figures

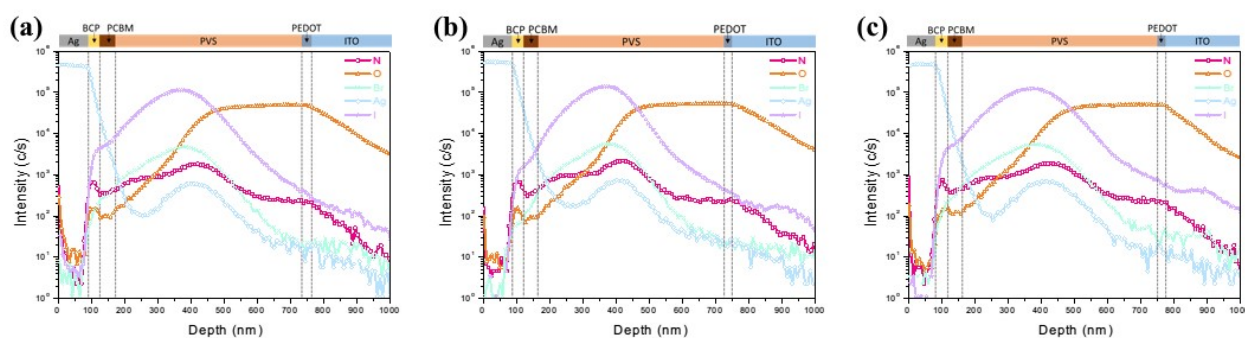

**Figure S1** The SIMS depth profiles for (a) PSCs without 2D treatment, (b) PSCs treated with  $\text{BDAl}_2$ , and (c) PSCs treated with  $\text{DMPDAI}_2$ .

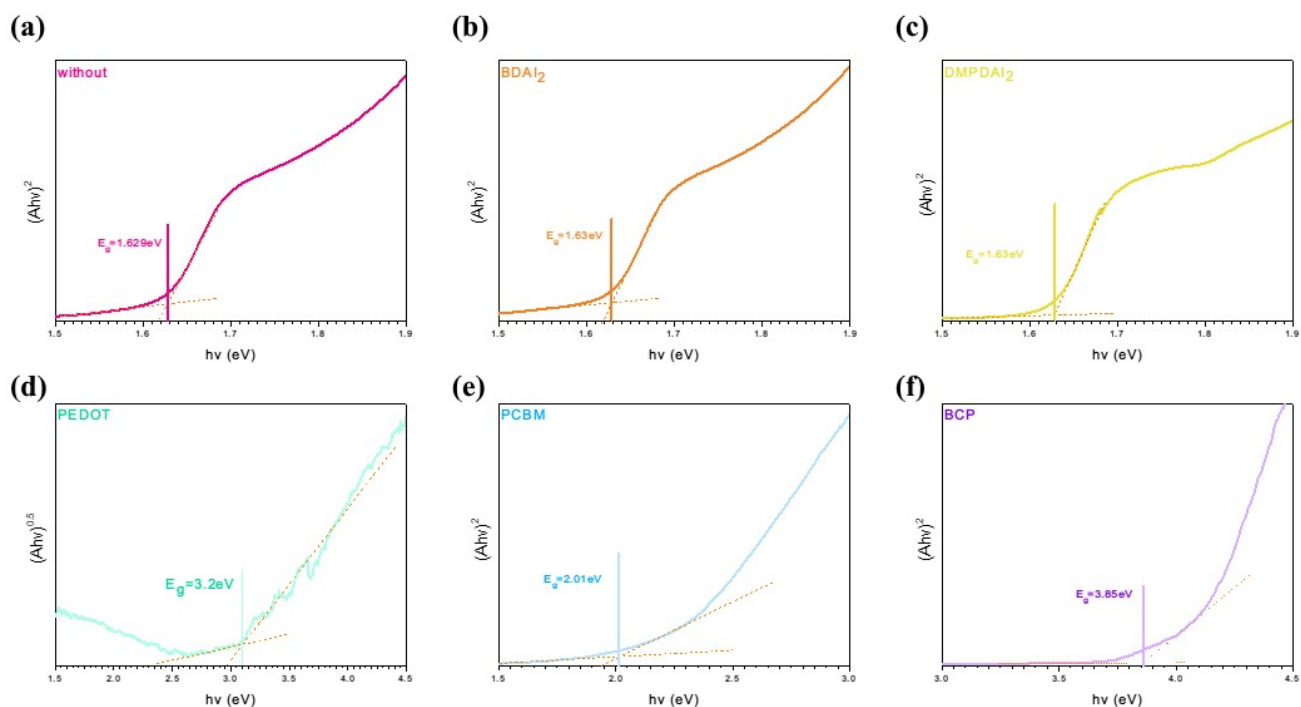

**Figure S2** The Tauc plots extracted from UV-vis absorption spectra for various perovskite solar cell (PSC) films: (a) those without 2D treatment, (b) those treated with BDAI<sub>2</sub>, (c) those treated with DMPDAI<sub>2</sub>, as well as for (d) PEDOT, (e) PCBM, and (f) BCP films.

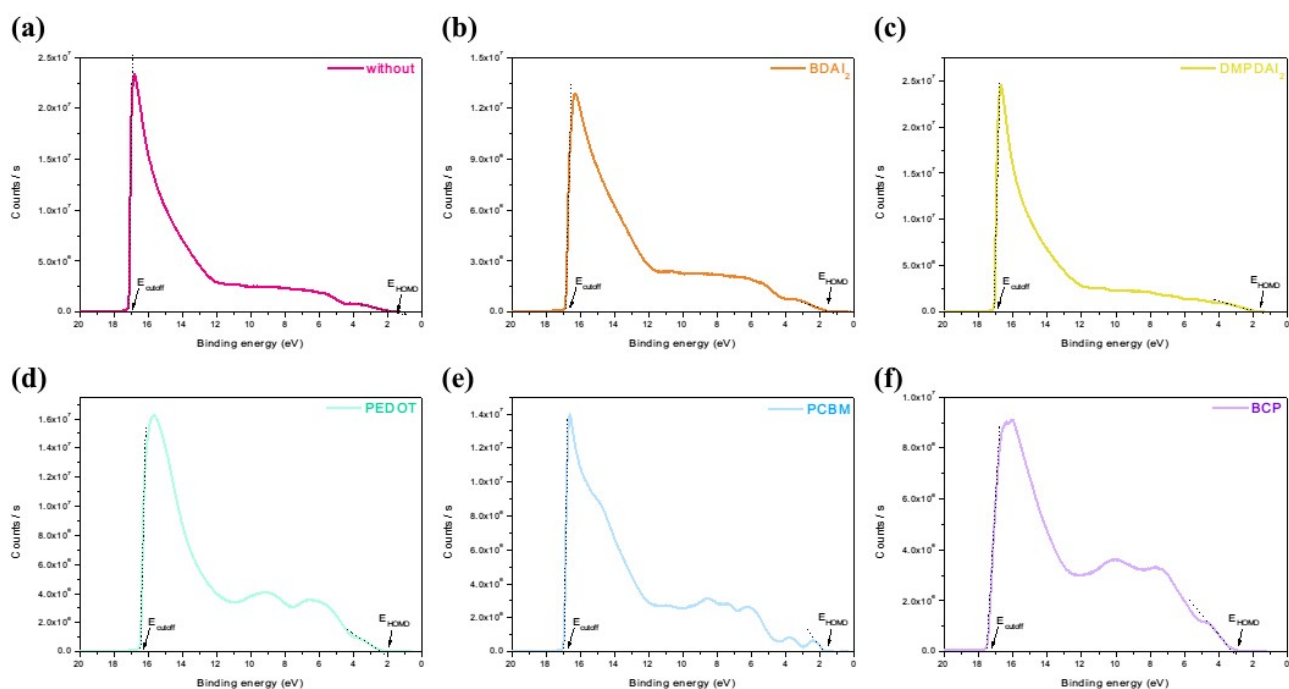

**Figure S3** The UPS spectra for various perovskite solar cell (PSC) films: (a) without 2D treatment, (b) treated with BDAI<sub>2</sub>, (c) treated with DMPDAI<sub>2</sub>, as well as for (d) PEDOT, (e) PCBM, and (f) BCP films.

**Table S1** The thickness parameters for PSCs without 2D treatment, those treated with BDAI<sub>2</sub>, and those treated with DMPDAI<sub>2</sub>.

|                     | Ag(nm) | BCP(nm) | PCBM(nm) | Perovskite(nm) | PEDOT:PSS(nm) |
|---------------------|--------|---------|----------|----------------|---------------|
| without             | 88     | 14      | 48       | 564            | 30            |
| BDAI <sub>2</sub>   | 88     | 14      | 48       | 567            | 30            |
| DMPDAI <sub>2</sub> | 86     | 17      | 44       | 567            | 30            |

**Table S2** The XRD parameters for perovskite films without 2D material treatment, those treated with BDAI<sub>2</sub>, and those treated with DMPDAI<sub>2</sub>.

|                     | PEAK position(2θ) | FWHM(β)  | Crystallite size(nm) |
|---------------------|-------------------|----------|----------------------|
| without             | 14.01             | 0.007924 | 1055.40              |
| BDAI <sub>2</sub>   | 14.01             | 0.008412 | 994.17               |
| DMPDAI <sub>2</sub> | 14.04             | 0.008692 | 962.18               |

**Table S3** The peak areas of XPS C 1s for perovskite films without 2D material, those treated with BDAI<sub>2</sub>, and those treated with DMPDAI<sub>2</sub>.

|                     | C-C    | C-NH <sub>2</sub> | N-C=N  |
|---------------------|--------|-------------------|--------|
| without             | 583.89 | 399.98            | 499.22 |
| BDAI <sub>2</sub>   | 821.28 | 152.58            | 594.23 |
| DMPDAI <sub>2</sub> | 535.81 | 389.34            | 401.97 |

**Table S4** Electronic parameters of different PSCs films extracted from UPS spectra.

|                     | WF(eV) | E <sub>VB</sub> (eV) | E <sub>g</sub> (eV) | E <sub>CB</sub> (eV) |
|---------------------|--------|----------------------|---------------------|----------------------|
| PEDOT               | 3.95   | -5.45                | 3.2                 | -2.25                |
| Without 2D          | 4.01   | -5.67                | 1.629               | -4.04                |
| BDAI <sub>2</sub>   | 4.29   | -5.72                | 1.63                | -4.09                |
| DMPDAI <sub>2</sub> | 4.09   | -5.76                | 1.63                | -4.13                |
| PCBM                | 4.21   | -5.95                | 2.01                | -3.94                |
| BCP                 | 3.71   | -6.92                | 3.85                | -3.07                |

**Table S5** The material parameters for PEDOT, PCBM, and BCP utilized in the TCAD simulation.

|                                                  | <b>PEDOT</b>       | <b>PCBM</b>        | <b>BCP</b>         |
|--------------------------------------------------|--------------------|--------------------|--------------------|
| <b>Relative Dielectric Permittivity</b>          | 2.2                | 3.9                | 11                 |
| <b><math>N_C</math> (cm<sup>-3</sup>)</b>        | $2 \times 10^{21}$ | $1 \times 10^{22}$ | $1 \times 10^{19}$ |
| <b><math>N_V</math> (cm<sup>-3</sup>)</b>        | $2 \times 10^{21}$ | $1 \times 10^{22}$ | $1 \times 10^{19}$ |
| <b>Mobility of electron (cm<sup>2</sup>/V-s)</b> | 1                  | 0.01               | 0.02               |
| <b>Mobility of hole (cm<sup>2</sup>/V-s)</b>     | 40                 | 0.01               | 2                  |
| <b>Lifetime of electron (s)</b>                  | $4 \times 10^{-6}$ | $4 \times 10^{-6}$ | $5 \times 10^{-9}$ |
| <b>Lifetime of hole (s)</b>                      | $4 \times 10^{-6}$ | $4 \times 10^{-6}$ | $2 \times 10^{-9}$ |
